# Supplementary material for: TiGER: A database for tissue-specific gene expression and regulation
Source: Springer Nature journal article supplement (doi:10.1186/1471-2105-9-271), 2008-06-09

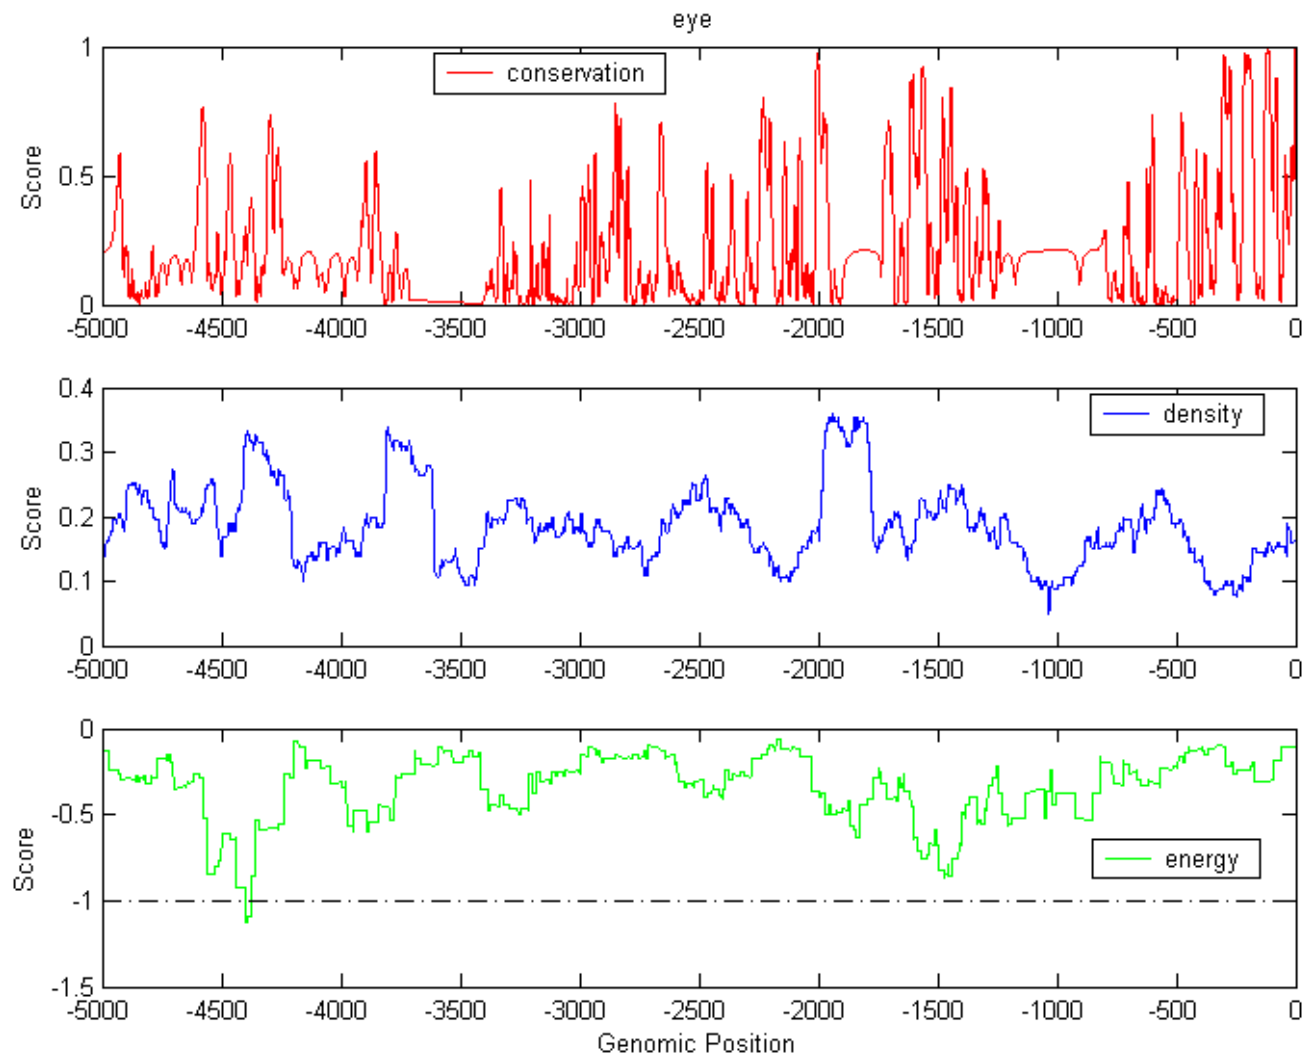

Supplement: 12859_2007_2256_MOESM2_ESM.pdf [file 12859_2007_2256_MOESM2_ESM.pdf]
