# Supplementary material for: TiGER: A database for tissue-specific gene expression and regulation
Source: Springer Nature journal article supplement (doi:10.1186/1471-2105-9-271), 2008-06-09
Supplement: 12859_2007_2256_MOESM3_ESM.pdf [file 12859_2007_2256_MOESM3_ESM.pdf]

## A. Gene View

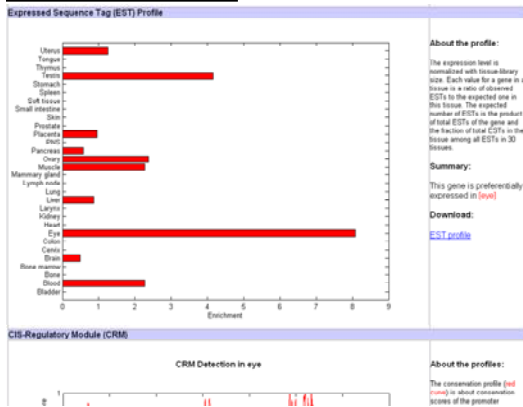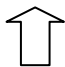

## C. Tissue View

## B. Transcription Factor View

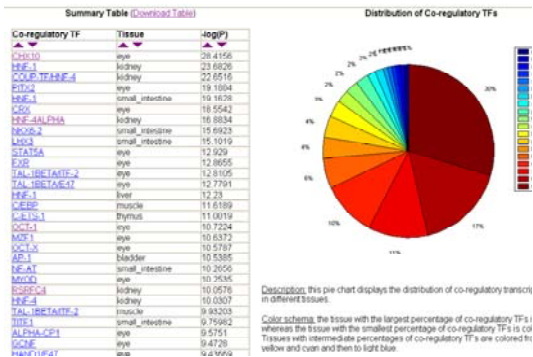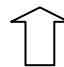

### 242 Cis-Regulatory Module (CRM) detections in eye

[Download Table](#)

| Chromosome ID | CRM Start Position | CRM End Position | Gene Name                 | Transcription Start Position | Orientation | Minimum Energy | Transcription Factors                                                                                                                                       |
|---------------|--------------------|------------------|---------------------------|------------------------------|-------------|----------------|-------------------------------------------------------------------------------------------------------------------------------------------------------------|
| chr.1         | 68623595           | 68623680         | <a href="#">NM_000329</a> | 68627663                     | -1          | -1.10877       | <a href="#">FOXJ2</a> :: <a href="#">POU3F2</a> :: <a href="#">STAT5A</a> :: <a href="#">SMAD-3</a> :: <a href="#">TATA</a>                                 |
| chr.1         | 168352546          | 168352581        | <a href="#">NM_000261</a> | 168353430                    | -1          | -1.22283       | <a href="#">OCT-1</a> :: <a href="#">FOXJ2</a> :: <a href="#">POU3F2</a> :: <a href="#">NR2E3</a> :: <a href="#">FOXO4</a>                                  |
| chr.1         | 168352381          | 168352413        | <a href="#">NM_000261</a> | 168353430                    | -1          | -1.15567       | <a href="#">OCT-1</a> :: <a href="#">FOXJ2</a> :: <a href="#">POU3F2</a> :: <a href="#">PBX1B</a> :: <a href="#">FOXO1</a>                                  |
| chr.1         | 168352357          | 168352368        | <a href="#">NM_000261</a> | 168353430                    | -1          | -1.01014       | <a href="#">FOXJ2</a> :: <a href="#">OCT-1</a> :: <a href="#">POU3F2</a> :: <a href="#">PBX1B</a> :: <a href="#">FOXO1</a>                                  |
| chr.1         | 193968043          | 193968048        | <a href="#">NM_012076</a> | 193969064                    | 1           | -1.00136       | <a href="#">FOXJ2</a> :: <a href="#">POU3F2</a> :: <a href="#">NKX6-2</a> :: <a href="#">OCT-1</a> :: <a href="#">MEIS1A/HOXA9</a> :: <a href="#">OCT-1</a> |

### 289 RefSeq Genes are preferentially expressed in eye

[Download Table](#)

| RefSeq                    | EST Enrichment | Gene Symbol | Description                                                           |
|---------------------------|----------------|-------------|-----------------------------------------------------------------------|
| <a href="#">NM_032753</a> | 20.1971        | MGC15631    | Homo sapiens hypothetical protein MGC15631 (MGC15631), mRNA           |
| <a href="#">NM_021225</a> | 20.1971        | PROL1       | Homo sapiens proline rich, lacrimal 1 (PROL1), mRNA                   |
| <a href="#">NM_033277</a> | 20.1971        | LACRT       | Homo sapiens lacritin (LACRT), mRNA                                   |
| <a href="#">NM_007374</a> | 20.1971        | SIX6        | Homo sapiens sine oculis homeobox homolog 6 (Drosophila) (SIX6), mRNA |
| <a href="#">NM_030657</a> | 20.1971        | LIM2        | Homo sapiens lens intrinsic membrane protein 2, 19kDa (LIM2), mRNA    |

### 307 transcription factor pairs co-regulate in eye

[Download Table](#)

| 1st Factor            | 2nd Factor             | -log(P) |
|-----------------------|------------------------|---------|
| <a href="#">FOXJ2</a> | <a href="#">POU3F2</a> | 39.9539 |
| <a href="#">CHX10</a> | <a href="#">CHX10</a>  | 32.5137 |
| <a href="#">CHX10</a> | <a href="#">CRX</a>    | 28.4156 |
| <a href="#">FOXJ2</a> | <a href="#">FOXJ2</a>  | 20.8575 |
| <a href="#">FOXJ2</a> | <a href="#">Oct-1</a>  | 20.6056 |
| <a href="#">CRX</a>   | <a href="#">PITX2</a>  | 19.1884 |
| <a href="#">CHX10</a> | <a href="#">GATA-6</a> | 18.7433 |
| <a href="#">CRX</a>   | <a href="#">CRX</a>    | 18.5442 |
